# Supplementary material for: A locomotor neural circuit persists and functions similarly in larvae and adult Drosophila
Source: eLife. 2021 Jul 14;10:e69767. doi: 10.7554/eLife.69767 (PMC8298091; doi:10.7554/eLife.69767)
Supplement: Figure 2—source data 1. [file elife-69767-fig2-data1.xlsx]

## Sheet: Figure 2O
Figure 2O - cell counting in larvae
Antibody marker	Scr	Scr/Hb	Scr/Bcd	Scr/Hb/Bcd
Cell counts	317	53	98	36
	342	61	107	27
	336	64	91	32
	294	48	75	21
	308	56	87	24
	324	54	102	34

## Sheet: Figure 2P
Figure 2P - cell counting in adults
Antibody marker	Scr	Scr/Hb	Scr/Bcd	Scr/Hb/Bcd
Cell counts	339	237	143	112
	367	251	138	125
	334	239	129	122
	319	223	118	106
	352	268	142	137
