# Supplementary material for: A locomotor neural circuit persists and functions similarly in larvae and adult Drosophila
Source: eLife. 2021 Jul 14;10:e69767. doi: 10.7554/eLife.69767 (PMC8298091; doi:10.7554/eLife.69767)
Supplement: Figure 3—source data 1. [file elife-69767-fig3-data1.xlsx]

## Sheet: Figure 3A
Figure 3A - 90sec Pair1 larvae speed/time
Seconds	Vehicle treatment										ATR treatment
1	20	27	13	22	26	8	18	24	14	13	22	13	24	20	17	3	19	27	17
2	21	26	12	21	28	9	21	25	2	15	24	14	25	24	18	3	21	23	16
3	20	25	14	14	21	2	22	21	4	14	21	12	26	29	16	0	20	24	17
4	18	0	13	15	25	2	24	24	15	14	24	13	27	22	19	17	20	21	15
5	20	0	12	7	27	15	25	25	21	13	24	14	28	25	4	19	21	20	12
6	0	2	11	5	29	21	21	27	24	15	21	13	26	24	9	22	25	20	2
7	0	24	14	3	30	25	24	23	25	14	24	15	25	21	19	24	27	19	15
8	0	25	15	15	23	27	27	21	21	16	24	16	25	20	18	25	21	21	17
9	0	26	18	25	25	21	25	25	24	21	21	2	25	19	14	23	23	24	15
10	19	23	9	24	26	24	22	25	21	4	25	2	24	18	16	22	22	23	18
11	20	27	10	19	28	26	23	25	2	2	24	0	25	12	17	22	21	21	18
12	21	25	13	26	21	27	21	21	2	4	21	4	21	13	16	22	21	8	17
13	21	4	14	28	24	28	24	25	17	21	25	13	25	15	18	21	21	1	19
14	21	4	16	31	25	21	25	26	21	23	25	14	24	16	18	25	19	14	21
15	23	24	14	23	21	24	23	24	22	21	21	15	26	11	18	25	20	16	25
16	0	26	15	25	22	22	14	25	9	26	24	17	25	3	16	25	12	18	23
17	0	26	16	21	24	21	12	21	23	25	24	13	24	0	17	20	13	19	21
18	21	27	13	26	25	25	7	24	21	24	20	14	23	15	19	19	14	16	24
19	22	24	4	21	26	26	4	23	23	25	14	8	23	20	20	18	10	21	26
20	20	25	13	24	25	28	1	25	24	29	15	13	23	23	20	10	9	23	23
21	22	3	16	25	26	32	2	24	25	26	12	14	22	21	24	2	8	25	22
22	21	25	18	26	27	25	18	24	20	21	3	12	24	22	25	17	2	25	20
23	0	25	15	23	21	26	21	22	21	20	4	14	25	25	24	18	16	26	13
24	0	26	16	21	24	27	24	21	24	19	15	15	24	26	3	18	17	28	5
25	21	27	14	20	23	21	23	24	24	14	17	21	11	25	5	19	19	28	15
26	22	32	17	17	21	22	23	23	21	12	12	22	4	24	14	23	22	27	18
27	21	35	14	7	22	25	0	21	22	0	15	24	18	25	18	25	24	24	22
28	21	36	13	2	23	7	0	24	24	16	16	26	14	26	19	25	23	26	25
29	22	32	17	15	24	3	0	21	20	13	14	24	16	25	19	23	21	25	24
30	23	29	13	17	21	2	0	6	19	17	17	21	16	25	21	21	26	27	27
31	22	28	14	21	24	25	13	2	31	4	18	19	14	24	19	24	19	25	11
32	21	30	15	24	25	26	15	1	30	21	21	18	17	25	16	20	22	24	0
33	24	32	12	25	27	21	21	0	24	7	20	21	12	23	15	15	0	24	0
34	22	29	8	12	21	25	25	0	32	4	3	11	12	21	12	0	0	16	0
35	25	26	9	23	24	27	21	24	34	21	0	0	3	14	0	0	0	3	0
36	26	25	5	26	28	25	20	25	30	24	0	0	0	0	0	0	0	3	0
37	0	24	4	21	24	21	20	21	22	21	0	0	0	0	0	0	0	3	0
38	0	27	12	27	21	24	21	23	21	24	0	0	0	0	0	0	0	3	0
39	0	25	14	29	27	21	19	23	26	24	0	0	1	0	1	0	0	3	0
40	0	24	15	30	24	26	18	11	21	23	0	1	1	0	1	0	0	3	0
41	0	27	14	5	25	29	19	24	24	24	0	1	0	1	1	2	1	0	0
42	24	28	12	8	26	27	17	21	25	21	0	1	0	1	1	2	1	0	0
43	21	30	12	25	24	0	20	2	22	18	0	2	1	1	2	4	1	0	2
44	22	31	12	21	21	0	21	24	21	16	0	0	0	1	2	2	1	0	2
45	25	32	16	26	24	0	22	21	20	4	0	0	0	1	2	2	1	0	2
46	26	30	17	27	6	21	21	2	13	3	0	1	0	1	1	2	1	0	3
47	23	31	18	23	2	25	3	3	15	12	0	0	0	1	1	1	1	0	5
48	23	30	12	24	4	26	4	15	16	12	0	1	0	1	0	3	1	0	6
49	21	31	14	24	2	21	0	13	12	16	2	1	0	1	0	1	1	0	4
50	19	31	15	22	25	24	0	24	14	15	4	1	0	1	1	1	1	0	2
51	17	30	17	24	21	26	14	19	12	14	2	3	0	1	1	0	1	1	2
52	16	29	10	24	24	18	18	21	14	23	3	2	0	0	1	0	1	2	2
53	15	29	8	21	25	17	14	18	0	21	4	4	5	0	1	0	1	1	2
54	14	28	3	19	26	15	15	17	0	26	3	5	7	0	1	0	1	2	2
55	14	5	2	18	21	14	16	18	21	25	4	3	5	0	1	0	1	2	2
56	14	8	4	16	24	20	13	19	11	24	5	3	6	0	1	0	1	2	2
57	8	0	15	15	21	16	14	20	19	21	3	3	6	0	1	0	1	2	0
58	2	0	16	17	24	13	12	20	18	25	4	3	6	0	1	2	1	1	0
59	3	18	18	20	25	15	14	21	17	24	5	3	5	0	1	4	1	2	0
60	6	25	21	20	21	15	16	25	13	21	5	3	3	0	1	7	1	2	0
61	7	29	22	21	23	16	18	21	15	5	6	3	5	0	1	7	1	2	0
62	12	41	14	24	23	13	15	23	12	7	7	3	6	0	1	7	1	4	0
63	14	35	15	8	23	0	14	24	14	23	4	8	6	3	1	7	1	5	4
64	16	22	17	6	25	0	15	21	14	21	7	6	7	4	1	7	1	5	16
65	0	11	12	13	21	0	16	25	14	26	15	9	8	17	1	7	1	5	17
66	0	16	15	22	20	0	17	24	10	25	13	10	8	25	1	15	1	5	17
67	0	18	17	21	14	24	13	27	24	24	15	16	13	27	14	18	1	6	16
68	13	24	13	19	15	21	14	24	25	21	21	17	16	29	18	22	1	18	18
69	15	25	14	24	12	23	15	25	22	25	24	13	17	33	22	25	1	18	19
70	23	23	12	25	0	22	14	26	27	24	25	14	23	24	25	26	1	17	22
71	23	25	15	25	0	24	13	23	26	21	26	15	25	25	24	31	1	18	24
72	22	27	16	24	21	22	15	3	28	23	23	12	26	23	26	29	1	19	26
73	22	22	13	26	24	18	15	2	27	24	25	16	23	21	23	25	16	23	28
74	22	24	14	25	25	13	14	4	26	26	25	17	25	22	8	24	21	26	0
75	21	18	12	6	23	2	13	0	28	25	27	5	21	22	19	27	24	27	0
76	23	15	11	2	23	2	17	22	21	24	22	2	23	22	21	25	23	2	28
77	24	13	14	18	25	9	11	22	24	21	21	2	24	22	24	21	24	16	21
78	22	15	11	25	26	17	19	21	24	24	24	15	25	25	23	24	2	19	19
79	21	16	4	23	23	21	16	23	26	24	18	16	21	26	24	26	2	21	13
80	24	12	8	23	2	15	21	26	24	21	3	17	24	22	23	22	2	24	15
81	24	28	7	21	3	23	22	23	27	24	4	15	21	24	23	23	18	25	18
82	22	29	15	24	2	25	26	21	24	24	13	14	24	21	23	21	17	23	16
83	21	21	12	20	1	21	24	24	21	27	14	15	21	20	22	8	16	21	15
84	0	25	15	15	24	23	21	25	20	26	18	15	13	3	17	1	19	23	14
85	0	27	16	26	25	22	20	19	13	25	21	15	7	4	22	13	20	22	13
86	0	28	18	27	21	21	25	1	15	24	24	17	4	15	25	17	17	22	15
87	25	30	19	26	24	12	21	3	12	21	22	18	4	18	26	19	17	22	16
88	23	24	13	21	26	13	24	8	1	26	23	21	13	16	21	20	16	24	17
89	22	27	16	24	21	15	25	4	23	25	22	20	25	15	21	24	17	24	17
90	25	22	12	21	20	17	25	2	25	23	24	20	27	16	26	21	15	24	18

## Sheet: Figure 3B
Figure 3B - pausing probability between 3 trials
Vehicle treatment	ATR treatment
0	0.66
0	0.66
0.33	1
0.33	1
0	1
0	0.66
0	0.66
0	1
0	1
0	1

## Sheet: Figure 3C
Figure 3C - Distance traveled
Experiment phase	Vehicle treatment										ATR treatment
Pre	95	87	106	82	74	102	91	94	78	82	98	82	73	81	79	92	85	80	91	90
Light	79	92	88	89	96	97	85	87	84	62	32	40	45	46	20	12	24	14	16	8
Post	80	91	82	85	91	86	82	93	78	73	70	54	72	44	51	38	71	59	43	67

## Sheet: Figure 3D
Figure 3D - percent time
		Immobile										Small Movement										Large Movement
Vehicle treatment	Pre	12	16	5	21	8	22	2	17	4	16	24	10	8	26	13	9	2	11	27	22	64	74	87	47	79	69	96	72	69	62
	Light	17	2	5	14	21	1	12	19	23	4	18	13	13	22	19	26	17	14	23	26	65	83	82	64	60	73	71	87	54	70
	Post	24	9	11	6	21	10	19	5	16	27	32	11	23	18	14	27	3	15	22	8	44	80	66	76	65	63	78	80	62	65
ATR treatment	Pre	3	15	14	7	20	11	6	12	17	6	27	22	21	24	14	15	7	18	14	26	70	63	65	69	66	74	87	70	66	68
	Light	47	42	38	36	37	42	38	49	54	58	36	28	44	44	46	45	47	27	24	36	17	30	18	20	17	13	15	24	22	6
	Post	33	22	27	34	19	25	16	21	26	27	12	29	28	13	25	17	24	26	32	29	55	49	45	53	56	58	60	53	42	44

## Sheet: Figure 3E
Figure 3E - Duration immobile
	Vehicle treatment										ATR treatment
Pre	0.97561	1.30081	0.406504	1.70732	0.650406	1.78862	0.162602	1.38211	0.325203	1.30081	0.27027	1.35135	1.26126	0.630631	1.8018	0.990991	0.540541	1.08108	1.53153	0.540541
Light	1.38211	0.162602	0.406504	1.13821	1.70732	0.0813008	0.97561	1.54472	1.86992	0.325203	4.23423	3.78378	3.42342	3.24324	3.33333	3.78378	3.42342	4.41441	4.86486	5.22523
Post	1.95122	0.731707	0.894309	0.487805	1.70732	0.813008	1.54472	0.406504	1.30081	2.19512	2.97297	1.98198	2.43243	3.06306	1.71171	2.25225	1.44144	1.89189	2.34234	2.43243

## Sheet: Figure 3F
Figure 3F - duration body translocating
	Vehicle treatment										ATR treatment
Pre	0.890125	1.02921	1.21001	0.653686	1.09875	0.959666	1.33519	1.00139	0.959666	0.862309	1.00287	0.902579	0.931232	0.988539	0.945559	1.06017	1.24642	1.00287	0.945559	0.974212
Light	0.904033	1.15438	1.14047	0.890125	0.834492	1.0153	0.987483	1.21001	0.751043	0.973574	0.243553	0.429799	0.25788	0.286533	0.243553	0.186246	0.2149	0.34384	0.315186	0.0859599
Post	0.611961	1.11266	0.917942	1.05702	0.904033	0.876217	1.08484	1.11266	0.862309	0.904033	0.787966	0.702006	0.644699	0.759312	0.802292	0.830946	0.859599	0.759312	0.601719	0.630372

## Sheet: Figure 3G
Figure 3G - duration small part movement
	Vehicle treatment										ATR treatment
Pre	1.57895	0.657895	0.526316	1.71053	0.855263	0.592105	0.131579	0.723684	1.77632	1.44737	1.43617	1.17021	1.11702	1.2766	0.744681	0.797872	0.37234	0.957447	0.744681	1.38298
Light	1.18421	0.855263	0.855263	1.44737	1.25	1.71053	1.11842	0.921053	1.51316	1.71053	1.91489	1.48936	2.34043	2.34043	2.44681	2.39362	2.5	1.43617	1.2766	1.91489
Post	2.10526	0.723684	1.51316	1.18421	0.921053	1.77632	0.197368	0.986842	1.44737	0.526316	0.638298	1.54255	1.48936	0.691489	1.32979	0.904255	1.2766	1.38298	1.70213	1.54255

## Sheet: Figure 3 - Supplement 1A
Figure 3 - Supplement 1A - 12 second Pair1 larvae speed/time
Seconds	Vehicle treatment										ATR treatment
1	29.2	41.4	23.2	28.9	24.3	32.4	31.2	19.2	28.2	31.2	28.3	35.1	30.4	19.2	13.4	31.5	24.5	27.7	23.1	28.6
2	30.6	39.8	24.9	28.2	23.5	34.5	30.2	18.2	24.5	34.5	29.1	32.8	31.2	18.7	13.9	32.8	25.6	26.4	24.4	29.9
3	31.5	39.2	23.9	27.6	22.9	35.6	30.6	13.4	26.4	34.5	27.8	34.5	31.5	20.1	13.2	33.1	25.1	26.7	23.9	29.3
4	32.8	40.1	23.3	29.1	21.3	36.1	29.9	12.9	27.3	34.1	28	33.2	30	19.9	14.2	32.4	26.7	28.1	25	28.7
5	28.2	40.8	22.4	30.4	23.5	34.2	28.1	15.6	28.3	34.6	4.5	4.7	3.4	4.3	8.2	18.3	4.4	12.5	4	4.5
6	28.3	41.4	23.1	28.1	24.1	35.1	28.4	14.7	28.9	32.1	0.3	1.2	0.4	0.8	8.9	6.7	0.4	14.9	0.6	0.5
7	29.1	38.2	24.6	28.9	24.9	35.8	29	15.3	29.4	36.2	0.9	0.4	0.4	0.4	6.2	5.8	0.4	13.8	0.4	0.5
8	31.2	37.1	24.1	30.4	24.1	34.3	31.3	16.7	26.1	33.1	0.4	0.4	0.4	0.4	4.5	6	0.4	19	0.4	0.4
9	32.3	37.9	23.9	30.7	23	35.1	30.4	18.3	26.8	34.5	18.9	20.6	23.4	18.5	12.1	25.5	31	21.7	18.9	24.5
10	32.8	36.1	22	31.2	22.5	35.6	30.2	19.2	25.2	34	25.7	29.4	25.4	23.4	17.6	27.4	32	27.7	25.6	26.2
11	29	35.7	22.6	31.9	21.4	34.1	29.1	19.3	27	32.9	29.1	28.3	24.9	24.1	25.8	29	33	28.3	26.7	26.7
12	29.5	34.2	24.1	30.4	22.3	34.9	30.4	18.9	29.1	32.6	28.6	28.6	25.6	24	26.6	30.4	35	27.4	27.2	27

## Sheet: Figure 3 - Supplement 1B
Figure 3 - Supplement 1B - Puasing probability between 3 trials
Vehicle treatment	ATR treatment
0	1
0	0.66
0	1
0.33	1
0	1
0.33	1
0	1
0	1
0.33	1
0	1
